# Supplementary material for: Trimetazidine and exercise provide comparable improvements to high fat diet-induced muscle dysfunction through enhancement of mitochondrial quality control
Source: PubMed Central journal article supplement (PMC8476493; doi:10.1038/s41598-021-98771-6), 2021-09-27

Supplementary Appendix

**Trimetazidine and Exercise Provide Comparable Improvements to High Fat Diet-induced Muscle Dysfunction through Enhancement of Mitochondrial Quality Control**

Wenliang Zhang<sup>1</sup>, Baiyang You<sup>1</sup>, Yaoshan Dun<sup>1,2</sup>, Dake Qi<sup>3</sup>, Ling Qiu<sup>1</sup>, Jeffrey W. Ripley-Gonzalez<sup>1</sup>, Fan Zheng<sup>1</sup>, Siqian Fu<sup>1</sup>, Cui Li<sup>1</sup> and Suixin Liu<sup>1,4\*</sup>

1. Division of Cardiac Rehabilitation, Department of Physical Medicine & Rehabilitation, Xiangya Hospital of Central South University, Changsha, Hunan, China.

2. Division of Preventive Cardiology, Department of Cardiovascular Medicine, Mayo Clinic, Rochester, MN, USA.

3. College of Pharmacy, University of Manitoba, Winnipeg, Canada

4. National Clinical Research Center for Geriatric Disorders, Xiangya Hospital of Central South University, Changsha, Hunan, China.

\* Corresponding Author. Suixin Liu, MD, Ph.D., Division of Cardiac Rehabilitation, Department of Physical Medicine & Rehabilitation, Xiangya Hospital of Central South University, 87 Xiangya Road, Changsha, Hunan, 410008, P.R. China. E-mail, liusuixin@csu.edu.cn (SXL); +86 (731)84327174

This supplementary appendix was created by the authors to provide all original gels/blots images for review.

Supplementary Fig.1 is the original gel/blots shown in figure 1 of the main manuscript, Supplementary Fig.2 is the original gel/blots shown in figure 2 of the main manuscript and so on.

In **Fig. 3**. TMZ promotes PA-attenuated mitochondrial quality control (MQC) and functions in muscle cells. The original data presents P-AMPK, PGC-1 $\alpha$ , LC3II/LC3I, BNIP3, DRP1, MFN1 and CS protein expressions were determined in four groups, we just cropped the right most group in the data analysis. In **Fig. 5**. TMZ regulates MQC and improves mitochondrial functions in HFD mice. The original data presents PGC-1 $\alpha$ , LC3II/LC3I, PINK1, DRP1 and MFN1 and CS protein expressions were determined in five groups, we just cropped the right most group in the data analysis.

Supplementary Fig. 1. TMZ prevents palmitate (PA)-induced muscle cell damage

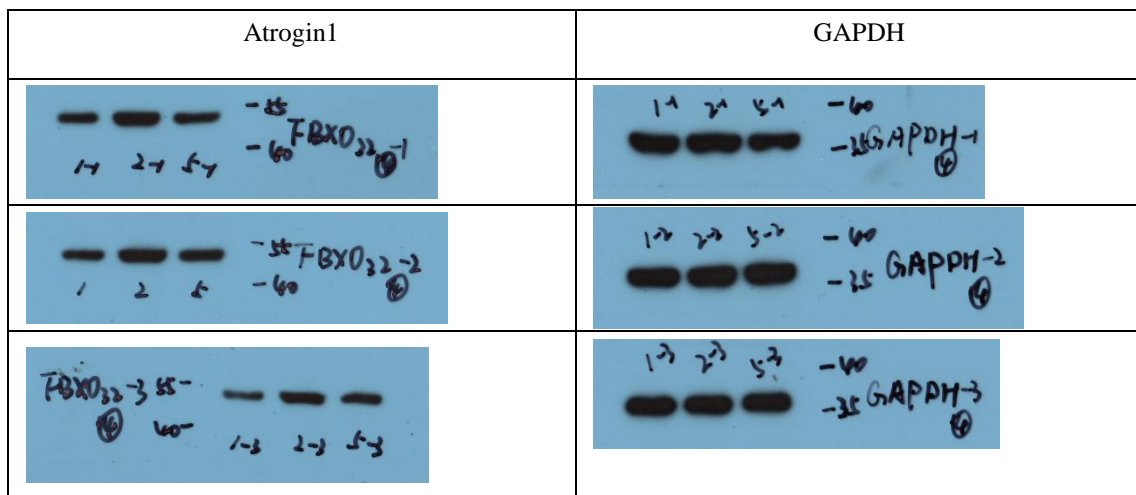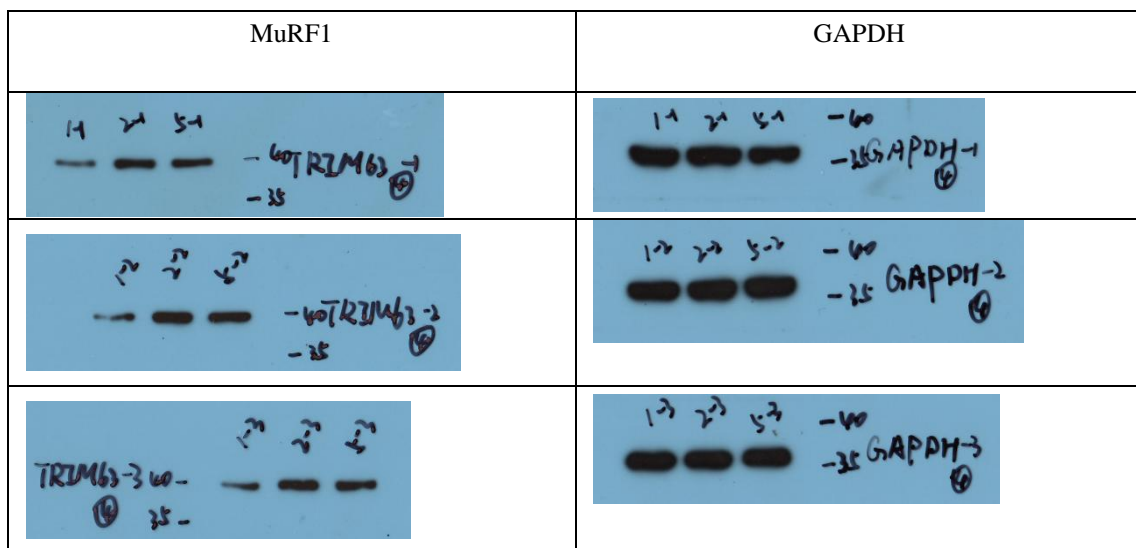

| MyHC-II                                                                           | GAPDH                                                                              |
|-----------------------------------------------------------------------------------|------------------------------------------------------------------------------------|
| 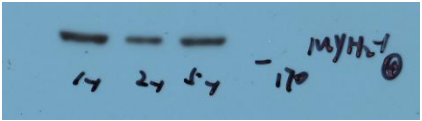 |  |
|  |  |
|  |  |

Supplementary Fig. 2. TMZ promotes PA-attenuated mitochondrial quality control (MQC) and functions in muscle cells

| P-AMPK                                                                              | GAPDH                                                                                |
|-------------------------------------------------------------------------------------|--------------------------------------------------------------------------------------|
| 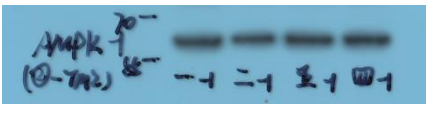 |  |
|  |  |
|  |  |

| PGC-1α                                                                              | GAPDH                                                                                |
|-------------------------------------------------------------------------------------|--------------------------------------------------------------------------------------|
| 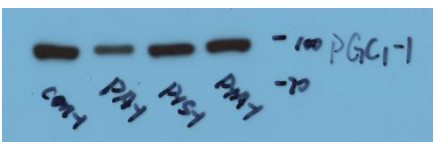 |  |

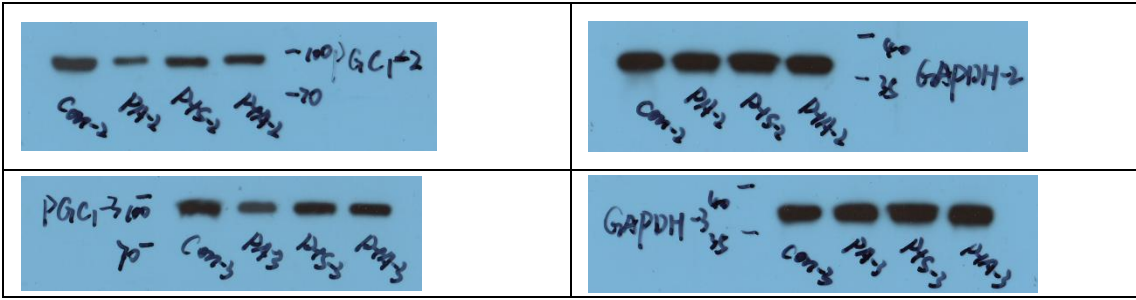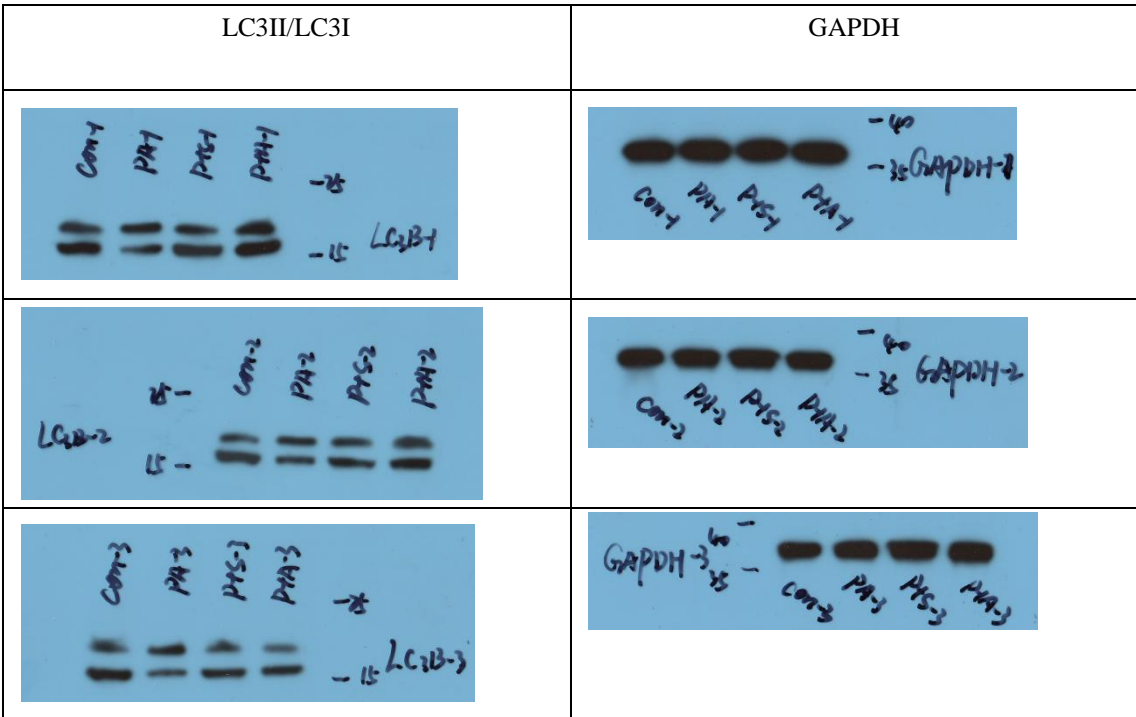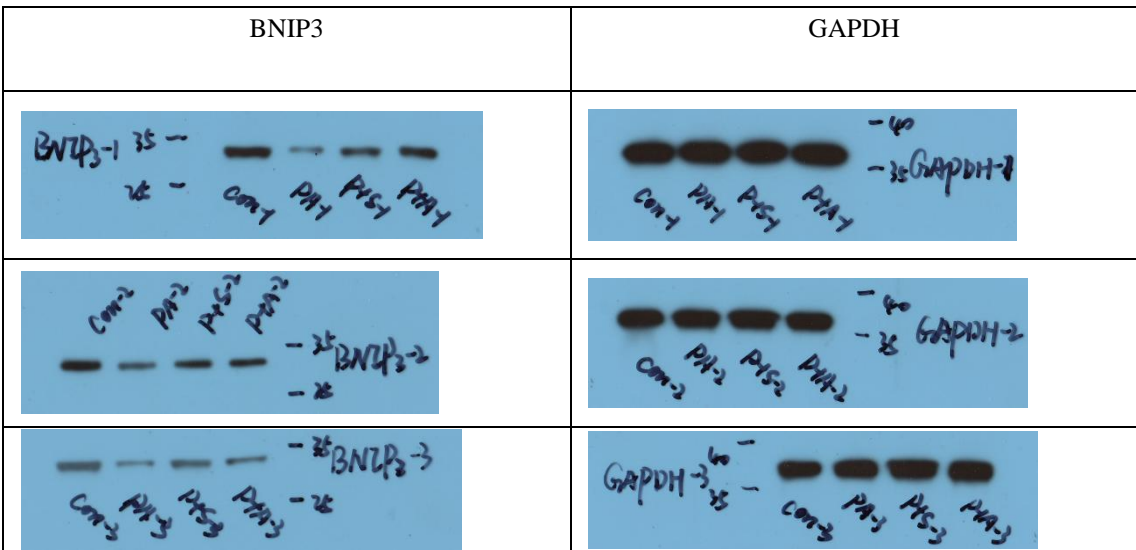

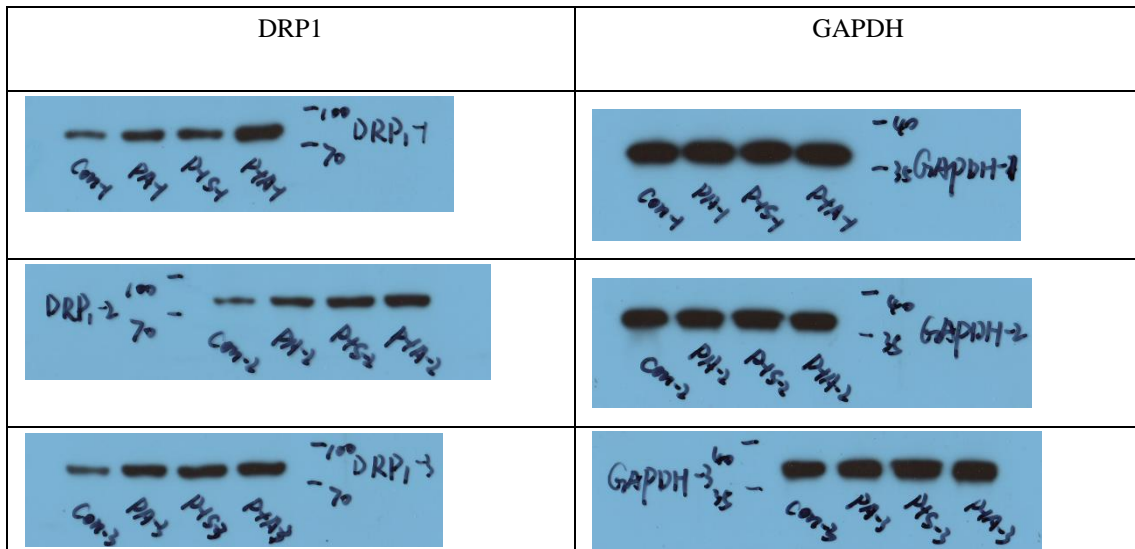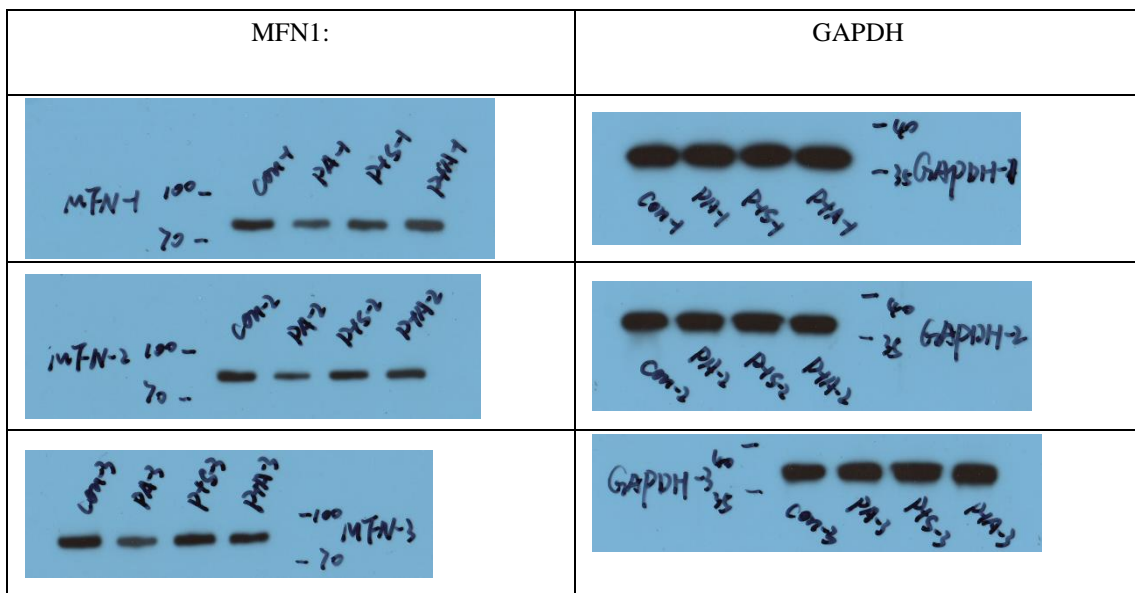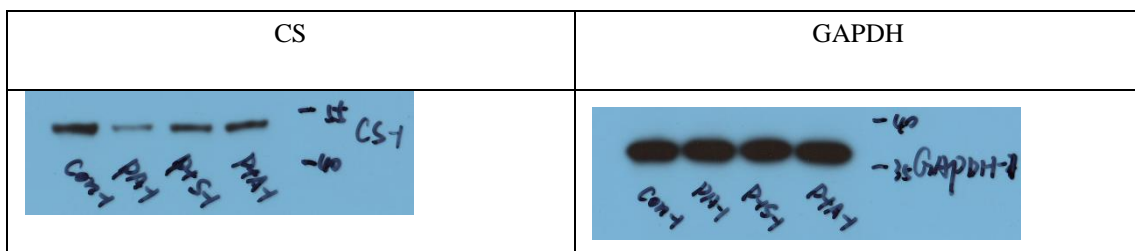

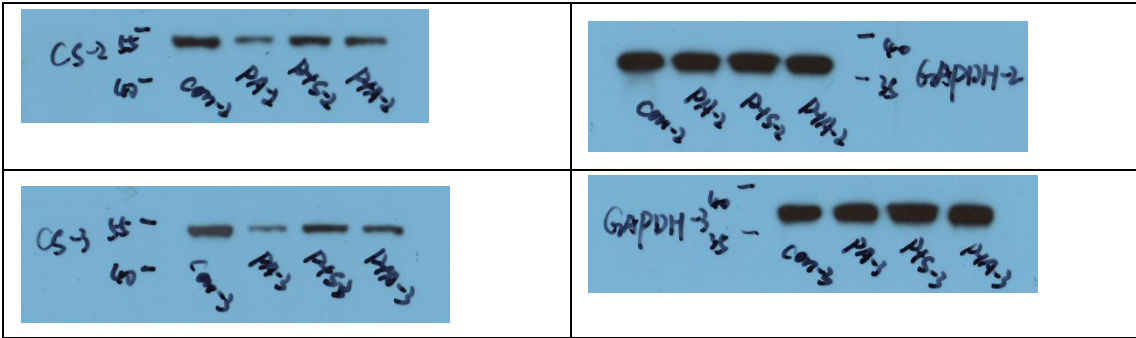

Supplementary Fig. 3. TMZ prevents metabolic dysfunction and muscle atrophy in mice following high-fat diet feeding as exercise

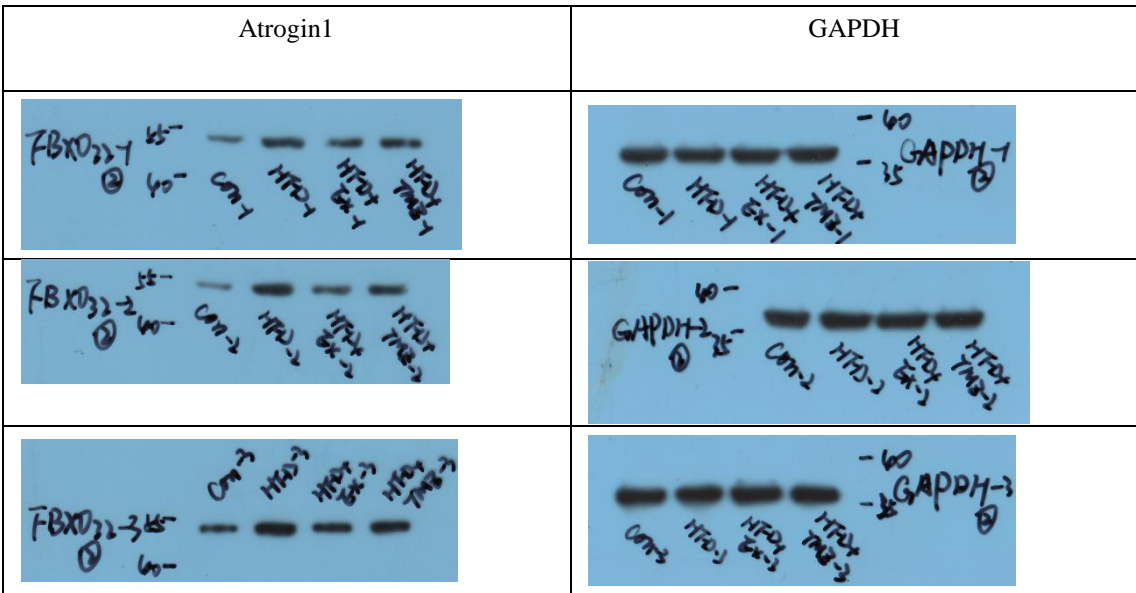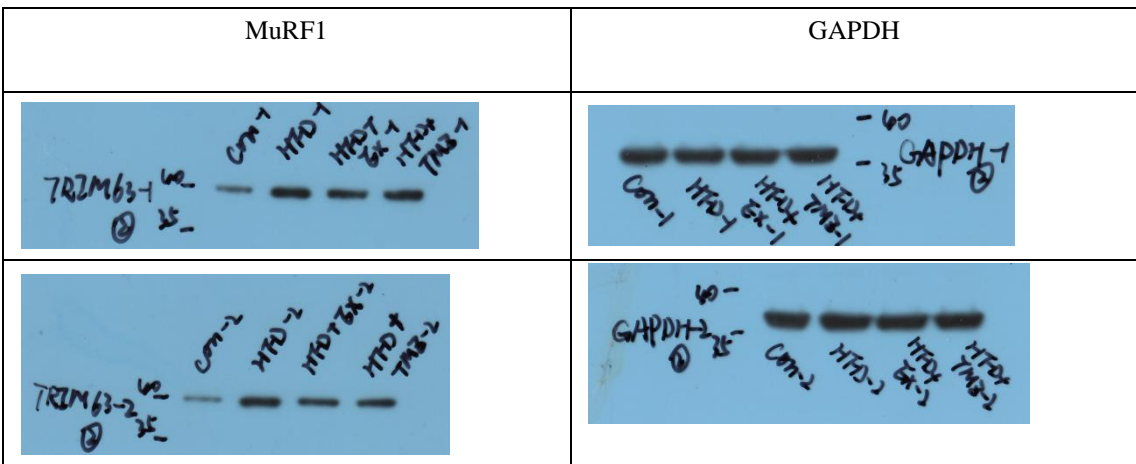

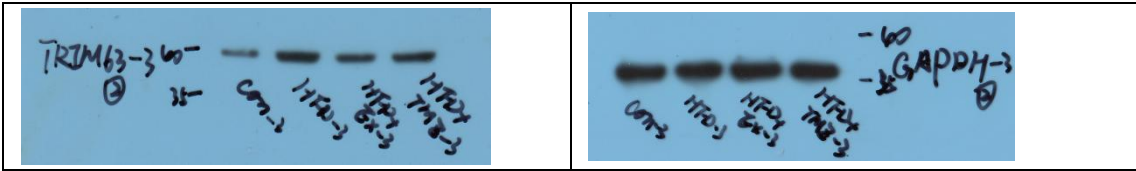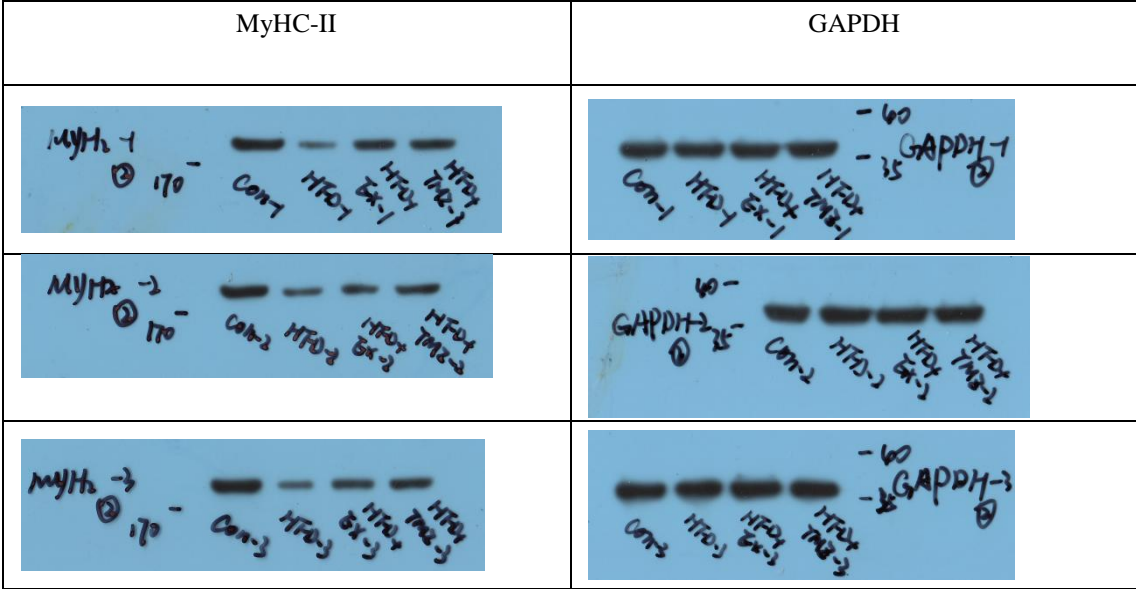

Supplementary Fig. 4. As exercise, TMZ regulates MQC and improves mitochondrial functions in HFD mice

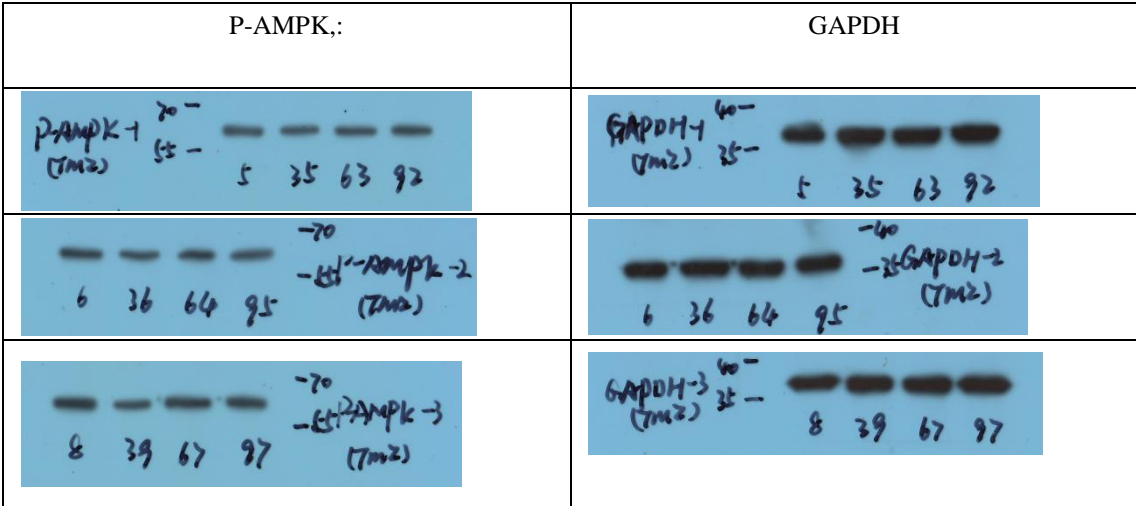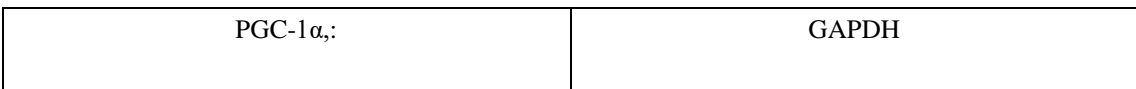

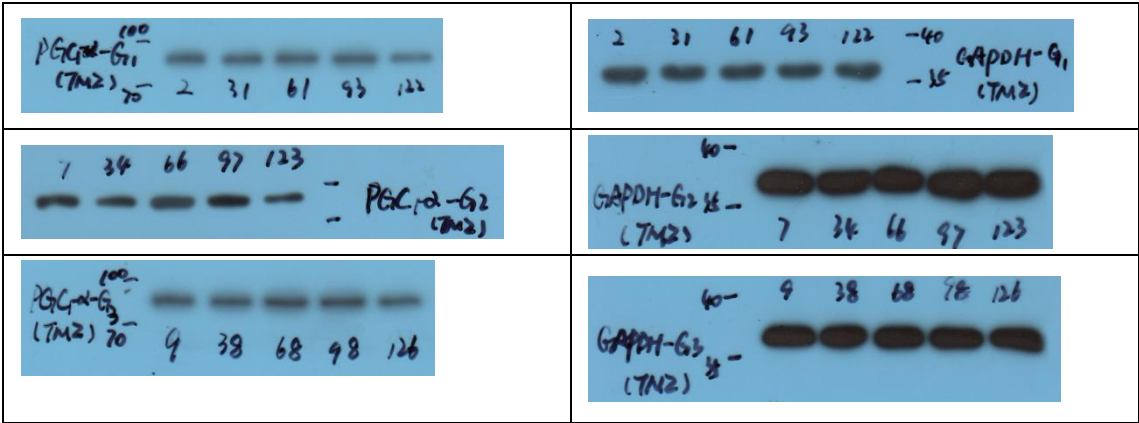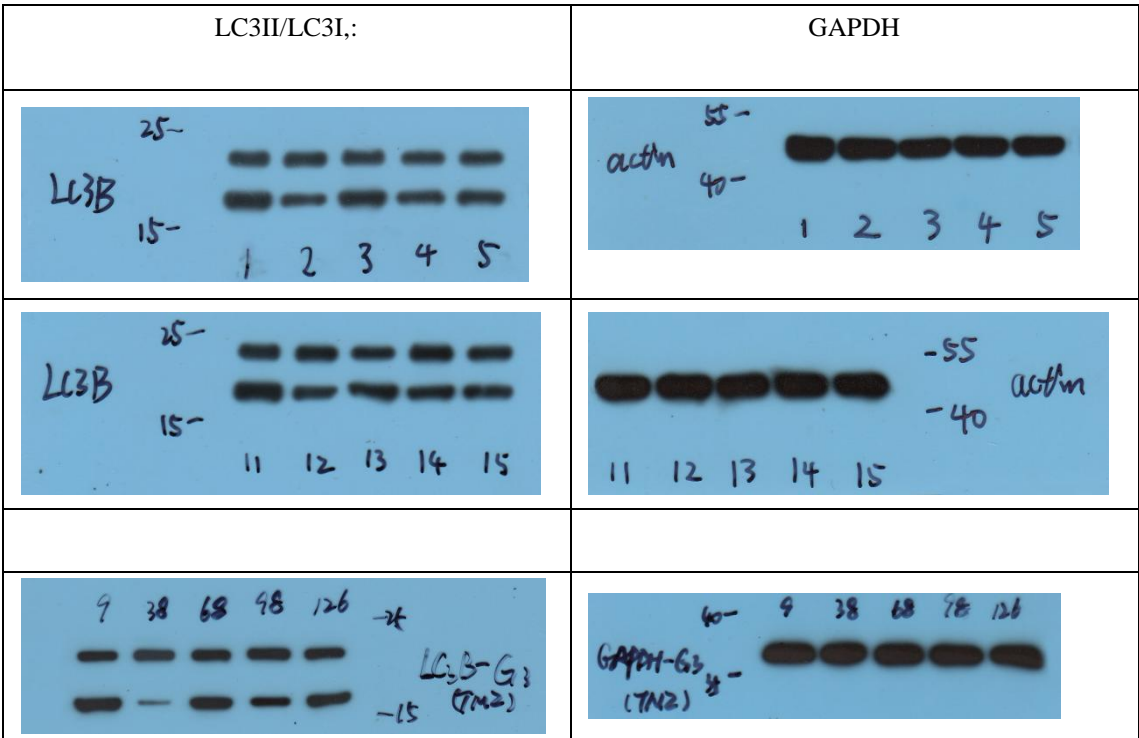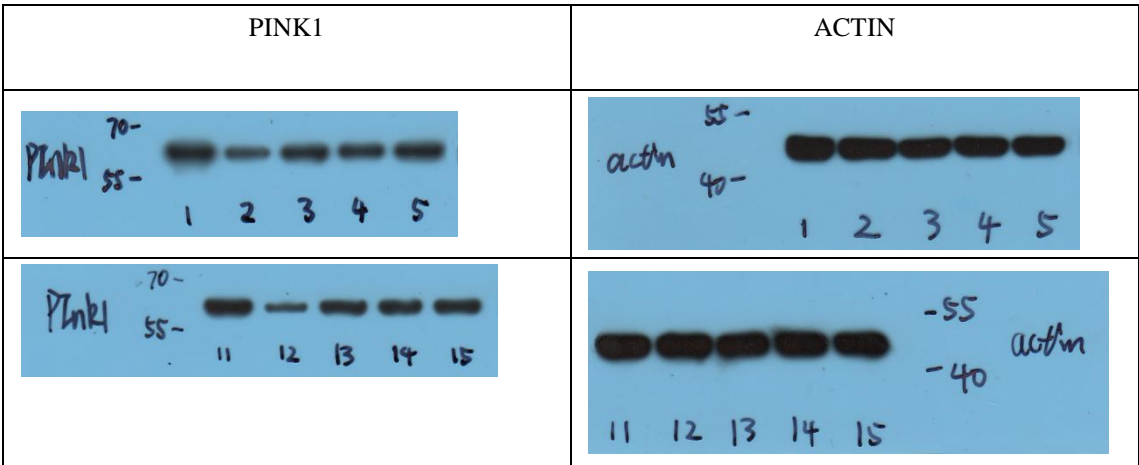



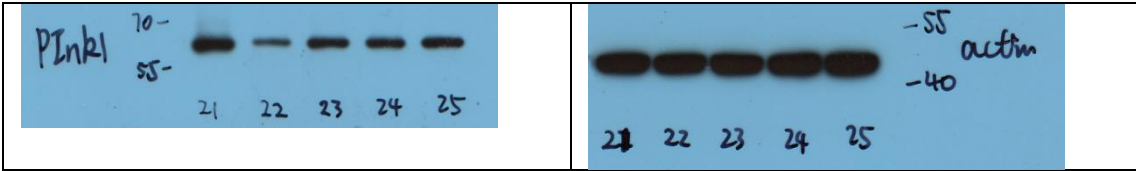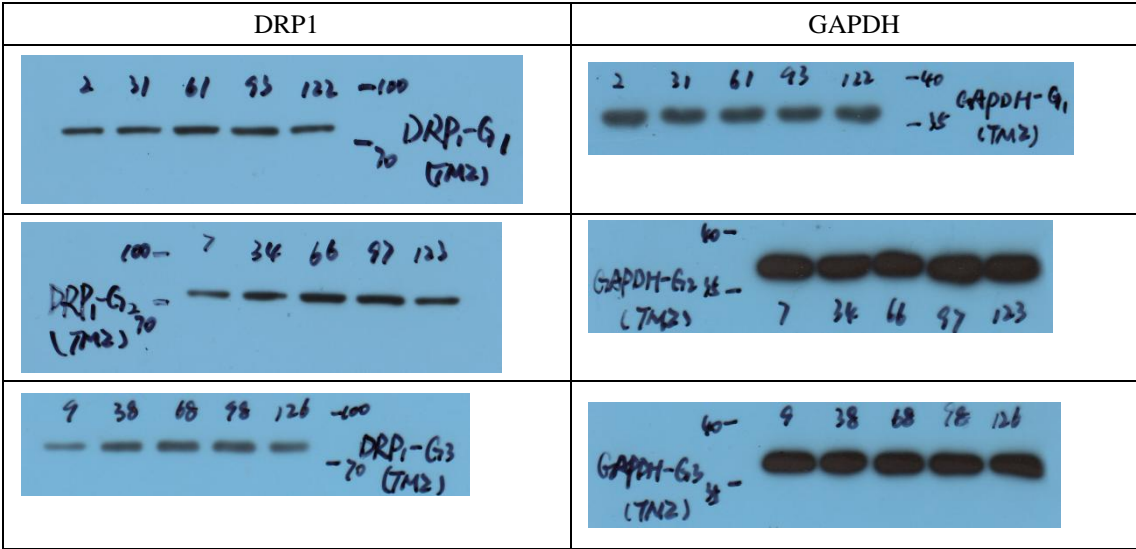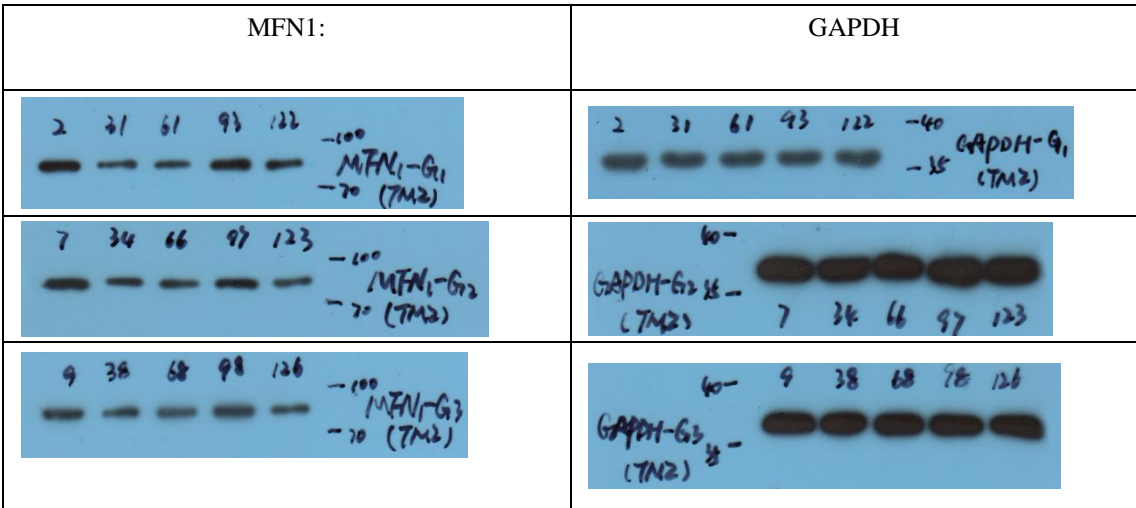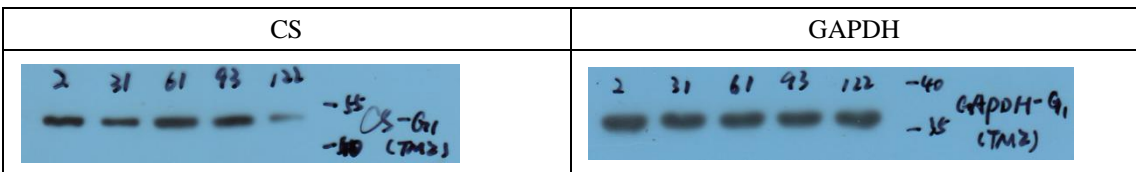

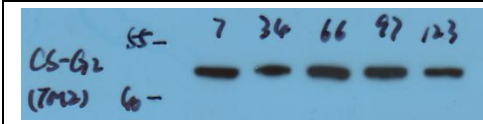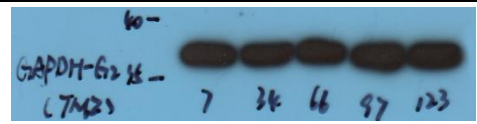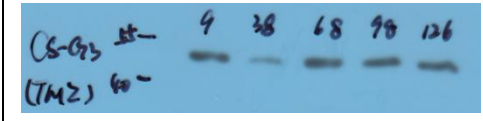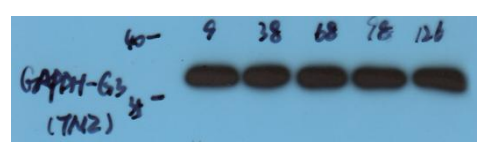

Supplement: 41598_2021_98771_MOESM1_ESM.pdf [file 41598_2021_98771_MOESM1_ESM.pdf]
